# Supplementary material for: Impact of endurance exercise and probiotic supplementation on the intestinal microbiota: a cross-over pilot study
Source: PubMed Central journal article supplement (PMC6556026; doi:10.1186/s40814-019-0459-9), 2019-06-08
Supplement: 40814_2019_459_MOESM1_ESM.pdf [file 40814_2019_459_MOESM1_ESM.pdf]

**Recruitment of 30 healthy athletic students at  
German Sport University Cologne  
Randomisation of participated subjects into two intervention groups**

**Intervention (T0, T1, T2, T3):**

**Microbiota analysis**

(Escherichia coli, E. coli biovars, Proteus spp., Klebsiella spp., Pseudomonas spp., Enterobacter spp., Citrobacter spp., Enterococcus spp., Bifidobacterium spp., Bacteroides spp., Lactobacillus spp., H<sub>2</sub>O<sub>2</sub> Lactobacilli, Clostridium spp., Faecalibacterium prausnitzii, Akkermansia muciniphila, yeasts, mold, total bacterial count, fecal pH-value, secretory immunoglobulin A, eosinophile protein X,  $\beta$ -Defensin 2, zonulin, alpha 1-antitrypsin, calprotectin, butyrate)

**Blood analysis**

(leucocytes, erythrocytes, haemoglobin, hematocrit, thrombocytes, mean corpuscular volume, tumor necrosis factor-alpha, interleukin-6, interleukin-8, interleukin-1 $\beta$ )

**Saliva analysis**

(tumor necrosis factor-alpha, interleukin-6, interleukin-8, interferon-gamma)

**Nutritional analysis**

(calories, carbohydrates, fats, proteins, fibres, vitamins)

**Anthropometry**

(height, weight, blood pressure, body fat, muscle mass)

**20 m shuttle run test**

(peak oxygen uptake, peak heart rate)

**Lifestyle questionnaire**

(physical activity, lifestyle data)

**2-week resting period  
Baseline**

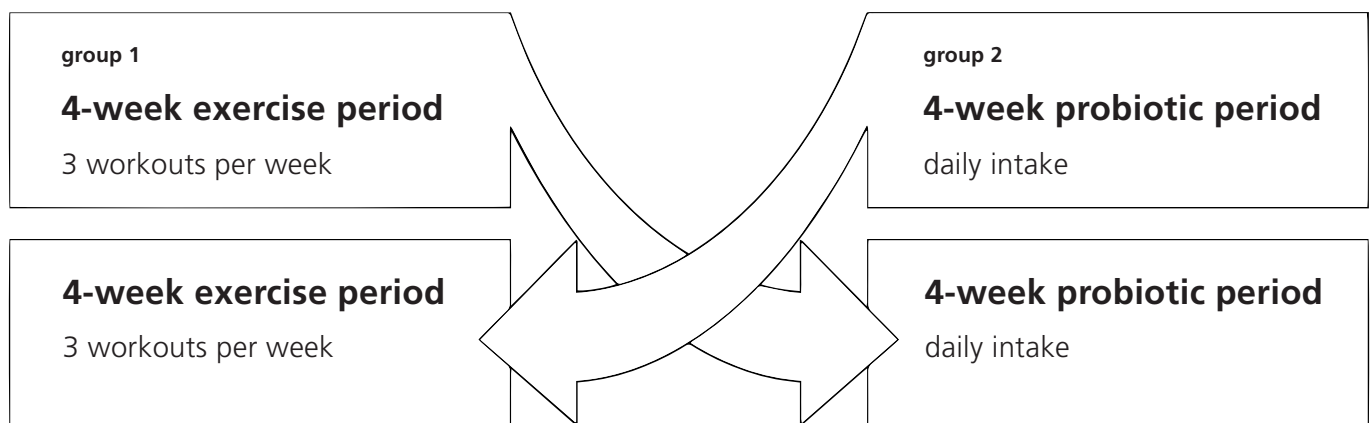

Additional file shows study design
