# Supplementary material for: Impact of endurance exercise and probiotic supplementation on the intestinal microbiota: a cross-over pilot study
Source: PubMed Central journal article supplement (PMC6556026; doi:10.1186/s40814-019-0459-9), 2019-06-08
Supplement: 40814_2019_459_MOESM3_ESM.pdf [file 40814_2019_459_MOESM3_ESM.pdf]

Each workout starts with warm up (10-15 min ABC running form drills) and ends with stretching (10 min)

|                             |                | <b>Content</b>                                                                                | <b>Intensity/Peak heart rate</b>                 |
|-----------------------------|----------------|-----------------------------------------------------------------------------------------------|--------------------------------------------------|
| <b>First training week</b>  |                |                                                                                               |                                                  |
|                             | First workout  | 2 x 1000 m target speed                                                                       | Ca. 75-85% HRpeak                                |
|                             |                | 4 km moderate endurance run                                                                   | Ca. 70-75% HRpeak                                |
|                             | Second workout | 5 x 400 m interval<br><br>3 min breaks between intervals<br><br>15 min stabilisation training | Ca. 80-85% HRpeak<br><br>Ca. 70% HRpeak<br><br>/ |
|                             | Third workout  | 6 km run                                                                                      | Ca. 70-75% HRpeak                                |
| <b>Second training week</b> |                |                                                                                               |                                                  |
|                             | First workout  | 3 x 1000 m target speed                                                                       | Ca. 75-85% HRpeak                                |
|                             |                | 5 km moderate endurance run                                                                   | Ca. 70-75% HRpeak                                |
|                             | Second workout | 6 km endurance run at aerobic threshold                                                       | Ca. 75-85% HRpeak                                |
|                             | Third workout  | 8 km run                                                                                      | Ca. 70-80% HRpeak                                |
| <b>Third training week</b>  |                |                                                                                               |                                                  |
|                             | First workout  | 2 x 2000 m target speed                                                                       | Ca. 75-85% HRpeak                                |
|                             |                | 6 km moderate endurance run                                                                   | Ca. 70-75% HRpeak                                |
|                             | Second workout | 6 x 400 m interval<br><br>3 min breaks between intervals<br><br>15 min stabilisation training | Ca. 75-85% HRpeak<br><br>Ca. 70% HRpeak<br><br>/ |
|                             | Third workout  | 8 km endurance run                                                                            | Ca. 75-85% HRpeak                                |
| <b>Fourth training week</b> |                |                                                                                               |                                                  |
|                             | First workout  | 3 x 2000 m target speed                                                                       | Ca. 75-85% HRpeak                                |
|                             |                | 6 km moderate endurance run                                                                   | Ca. 70-75% HRpeak                                |
|                             | Second workout | 7 x 400 m interval<br><br>3 min breaks between intervals<br><br>15 min stabilisation training | Ca. 75-85% HRpeak<br><br>Ca. 70% HRpeak<br><br>/ |
|                             | Third workout  | 10 km run                                                                                     | Ca. 75-85% HRpeak                                |

Additional file 2 shows exercise period
